# Supplementary material
Source: publisher figshare collection journal article supplement (https://gsapubs.figshare.com/articles/dataset/_/24514171)
Supplement: Supplementary file 1 [file 1]

He, A., Yan, Y., Dilek, Y., Zhu, Z., and Zhao, Q., 2023, Landscape inversion episodes in SE China during the Mesozoic–early Cenozoic: Constrained by trace-element contents, Nd isotope geochemistry, and detrital zircon U-Pb geochronology of sedimentary basins: GSA Bulletin, <https://doi.org/10.1130/B36739.1>.

## Supplemental Material

Table S1. Information of samples from Yong'an basin

Table S2. Analysis results of trace elements from Yong'an basin

Table S3. Lithology and Nd isotopic compositions of samples from Yong'an basin

Table S4. Detrital zircon U-Pb geochronology of samples from Yong'an basin

Table S5. Element ratios of samples from Yong'an basin

Table S6. Calculation of denudation rates based on low-temperature thermochronology data

**Table S1** Information of samples from Yong'an basin

| Stratigraphy                            | Fm.       | Location     | Coordinate               | Sample No. | Lithology              | Analysis                    |
|-----------------------------------------|-----------|--------------|--------------------------|------------|------------------------|-----------------------------|
| Upper Cretaceous                        | Chong'an  | Shangjiabang | 117.20561662,25.30406144 | SCA-9      | Argillaceous siltstone | Trace element<br>Nd isotope |
|                                         |           |              | 117.20626111,25.30413998 | SCA-7      | Argillaceous siltstone |                             |
|                                         |           |              | 117.20664781,25.30406294 | SCA-5      | Argillaceous siltstone |                             |
|                                         |           |              | 117.20909677,25.30400819 | SCA-4      | Fine sandstone         |                             |
|                                         |           |              | 117.20991304,25.30414511 | SCA-2      | Fine sandstone         |                             |
| Lower<br>Cretaceous-Upper<br>Cretaceous | Shaxian   | Shangjiabang | 117.21045007,25.30408764 | SSX-24     | Argillaceous siltstone | Trace element<br>Nd isotope |
|                                         |           |              | 117.21169592,25.30397288 | SSX-20     | Argillaceous siltstone |                             |
|                                         |           |              | 117.21246919,25.30385748 | SSX-14     | Siltstone              |                             |
|                                         |           |              | 117.21470303,25.30296786 | SSX-11     | Siltstone              | U–Pb<br>geochronology       |
|                                         |           |              | 117.21607763,25.30230989 | SSX-8      | Coarse sandstone       |                             |
|                                         |           |              | 117.21667898,25.30223299 | SSX-7      | Fine sandstone         |                             |
|                                         |           |              | 117.20909677,25.30400819 | SSX-4      | Fine sandstone         |                             |
| Lower Cretaceous                        | Bantou    | Yong'an      | 117.3147636,25.96263147  | JS- 10     | Mudstone               | Trace element<br>Nd isotope |
|                                         |           |              | 117.32328236,25.95825690 | JS- 6      | Mud shale              |                             |
|                                         |           |              | 117.32381344,25.95791445 | JS- 4      | Mud shale              |                             |
|                                         |           |              | 117.32423186,25.95742248 | JS- 2      | Fine sandstone         | U–Pb<br>geochronology       |
| Middle Jurassic                         | Zhangping | Zhangping    | 117.43989944,25.28230351 | ZPD-7      | Mudstone               | Trace element               |
|                                         |           |              | 117.43940592,25.28131399 | ZPD-2      | Mudstone               | Nd isotope                  |

**Table S2** Analysis results of trace elements from Yong'an basin

| Samples | ZPD-2  | ZPD-7  | JS-4-2 | JS-6   | JS-10  | SSX-4  | SSX-7  | SSX11  | SSX-14 | SSX-20 | SSX-24 | SCA-2  | SCA-4  | SCA-5  | SCA-7  | SCA-9  |
|---------|--------|--------|--------|--------|--------|--------|--------|--------|--------|--------|--------|--------|--------|--------|--------|--------|
| ppm     |        |        |        |        |        |        |        |        |        |        |        |        |        |        |        |        |
| Sc      | 15.26  | 15.06  | 13.73  | 8.45   | 14.03  | 9.81   | 9.05   | 9.91   | 7.99   | 6.72   | 8.26   | 8.72   | 7.55   | 11.68  | 8.74   | 9.63   |
| Ti      | 4976.2 | 4515.1 | 4054.5 | 2929.9 | 6060.1 | 3634.7 | 3099.6 | 3423.1 | 3149.2 | 2559.5 | 2968.4 | 3402.9 | 2771.6 | 3269.6 | 3777.6 | 3255.7 |
| V       | 78.95  | 81.87  | 88.49  | 33.34  | 139.2  | 77.54  | 49.1   | 53.87  | 42.87  | 35.04  | 53.06  | 46.1   | 40.68  | 50.33  | 54.68  | 52.21  |
| Cr      | 67.53  | 63.12  | 56.42  | 32.5   | 92.18  | 45.16  | 41.99  | 39.41  | 70.86  | 57.58  | 58.62  | 46.09  | 66.45  | 64.98  | 106.7  | 72.08  |
| Mn      | 69.23  | 72.37  | 462.2  | 181.4  | 30.35  | 939.9  | 232    | 365.1  | 457    | 375.9  | 518.9  | 538.7  | 162.6  | 548.4  | 457    | 484.2  |
| Co      | 3.931  | 4.361  | 7.28   | 6.21   | 2.42   | 12.39  | 6.34   | 6.53   | 8.14   | 5.21   | 6.48   | 6.86   | 5.41   | 7      | 7.83   | 7.42   |
| Ni      | 10.46  | 10.4   | 27.9   | 14.54  | 25.6   | 17.95  | 19.87  | 15.91  | 31.16  | 25.08  | 26.24  | 19.93  | 26.39  | 30.21  | 47.35  | 33.35  |
| Cu      | 16.24  | 16.09  | 19.6   | 10.55  | 13.7   | 17     | 14.01  | 13.15  | 10.69  | 10.04  | 12.47  | 11.95  | 8.86   | 13.07  | 12.64  | 12.91  |
| Zn      | 53     | 49.71  | 95.11  | 53.61  | 26.08  | 66.48  | 83.23  | 70.48  | 55.63  | 46.25  | 63.42  | 66.24  | 52.81  | 68.31  | 63.86  | 73.17  |
| Ga      | 26.57  | 26.01  | 23.75  | 17.34  | 23.48  | 14.82  | 13.45  | 16.61  | 12.91  | 10.19  | 14.16  | 14.18  | 11.34  | 15.44  | 13.71  | 15.28  |
| Ge      | 3.092  | 2.738  | 3.17   | 2.28   | 1.73   | 1.78   | 2.03   | 2.91   | 1.79   | 1.43   | 1.97   | 1.98   | 1.41   | 2.01   | 1.98   | 1.98   |
| Rb      | 259.7  | 262.6  | 235.6  | 138.8  | 150.4  | 184.8  | 163.9  | 201.6  | 141    | 112.1  | 172.1  | 168.7  | 134.6  | 194.4  | 146.1  | 193.2  |
| Sr      | 31.21  | 26.6   | 106.7  | 123    | 74.87  | 20.43  | 57.51  | 203.3  | 77.52  | 62.61  | 82.17  | 81.39  | 46.89  | 72.26  | 80.57  | 71.27  |
| Y       | 44.23  | 38.02  | 37.2   | 36.49  | 35.36  | 15.38  | 34.25  | 34.71  | 27.1   | 19.72  | 29.78  | 22.3   | 19.52  | 28.29  | 32.14  | 29.54  |
| Zr      | 192.7  | 172.8  | 151.3  | 250.6  | 230.8  | 179.7  | 164.7  | 202.1  | 254.3  | 169.3  | 166.3  | 80.12  | 204.9  | 208.7  | 354.9  | 208.9  |
| Nb      | 21.24  | 19.69  | 23.81  | 22.14  | 20.82  | 13.22  | 12.69  | 14.6   | 12.99  | 11.19  | 14.32  | 14.57  | 11.22  | 17.35  | 16.52  | 15.92  |
| Cs      | 14.42  | 14.66  | 30.93  | 13.4   | 15.48  | 13.96  | 14.83  | 19.14  | 8.96   | 8.42   | 13.61  | 10.86  | 10.35  | 17.06  | 9.59   | 16.44  |

|    |       |       |       |       |       |       |       |       |       |       |       |       |       |       |       |       |
|----|-------|-------|-------|-------|-------|-------|-------|-------|-------|-------|-------|-------|-------|-------|-------|-------|
| Ba | 686.9 | 682.5 | 512.1 | 562.5 | 341.1 | 346.2 | 417   | 962.3 | 480.1 | 365.8 | 572   | 361.1 | 291.8 | 509.3 | 438.7 | 461.1 |
| La | 67.49 | 63.76 | 49.22 | 53.65 | 53.93 | 12.71 | 38.55 | 92.93 | 36.07 | 30.82 | 41.88 | 39.6  | 26.87 | 44.31 | 42.94 | 40.4  |
| Ce | 130.1 | 120.8 | 99.33 | 103.5 | 94.19 | 29.21 | 69.83 | 153.8 | 64.78 | 57.62 | 80.96 | 69.5  | 60.43 | 93.87 | 77.26 | 82.24 |
| Pr | 15.66 | 14.83 | 11.39 | 12.01 | 12.39 | 2.22  | 8.87  | 21.12 | 7.9   | 6.35  | 10.31 | 9.47  | 6.31  | 9.5   | 9.63  | 9.39  |
| Nd | 57.79 | 54.43 | 40.79 | 43.58 | 44.79 | 8.42  | 33.79 | 69.82 | 28.93 | 23.26 | 37.85 | 35.14 | 23.2  | 34.02 | 34.58 | 35.34 |
| Sm | 10.6  | 9.64  | 7.36  | 7.85  | 7.23  | 1.53  | 6.52  | 11.76 | 5.39  | 4.13  | 6.69  | 5.98  | 4.25  | 6.1   | 6.2   | 6.42  |
| Eu | 1.749 | 1.607 | 1.1   | 1.12  | 1.38  | 0.35  | 1.51  | 2.1   | 1.04  | 0.78  | 1.27  | 1.07  | 0.75  | 1.07  | 1.08  | 1.18  |
| Gd | 9.499 | 8.333 | 6.68  | 6.94  | 6.05  | 1.8   | 6.39  | 8.56  | 4.9   | 3.81  | 5.9   | 4.76  | 3.77  | 5.65  | 5.73  | 5.88  |
| Tb | 1.435 | 1.22  | 1.03  | 1.05  | 0.93  | 0.33  | 1.05  | 1.22  | 0.79  | 0.57  | 0.88  | 0.7   | 0.57  | 0.84  | 0.9   | 0.87  |
| Dy | 7.891 | 6.835 | 6.03  | 5.94  | 5.61  | 2.13  | 6.03  | 6.3   | 4.57  | 3.33  | 5.04  | 3.99  | 3.34  | 4.89  | 5.31  | 4.99  |
| Ho | 1.536 | 1.366 | 1.29  | 1.26  | 1.22  | 0.53  | 1.22  | 1.22  | 0.95  | 0.71  | 1.02  | 0.79  | 0.71  | 1.02  | 1.13  | 1.03  |
| Er | 4.09  | 3.646 | 3.54  | 3.47  | 3.43  | 1.59  | 3.19  | 3.22  | 2.65  | 1.96  | 2.79  | 2.21  | 2.02  | 2.77  | 3.17  | 2.84  |
| Tm | 0.575 | 0.511 | 0.53  | 0.53  | 0.51  | 0.26  | 0.46  | 0.45  | 0.39  | 0.29  | 0.4   | 0.32  | 0.31  | 0.41  | 0.48  | 0.42  |
| Yb | 3.782 | 3.401 | 3.54  | 3.61  | 3.31  | 1.84  | 3.02  | 2.98  | 2.68  | 1.95  | 2.7   | 2.12  | 2.02  | 2.77  | 3.22  | 2.77  |
| Lu | 0.566 | 0.514 | 0.55  | 0.55  | 0.51  | 0.3   | 0.46  | 0.45  | 0.41  | 0.3   | 0.42  | 0.32  | 0.32  | 0.43  | 0.51  | 0.44  |
| Hf | 5.599 | 5.119 | 4.65  | 7.44  | 6.4   | 5.24  | 4.76  | 5.76  | 6.97  | 4.86  | 4.89  | 2.58  | 5.64  | 6.11  | 9.72  | 6.08  |
| Ta | 1.599 | 1.526 | 1.73  | 1.59  | 1.47  | 0.92  | 0.9   | 1.06  | 0.93  | 0.83  | 1.05  | 1.05  | 0.81  | 1.25  | 1.2   | 1.19  |
| Pb | 37.39 | 30.45 | 26.09 | 26.82 | 13.63 | 21.74 | 17.53 | 28.05 | 19.25 | 16.97 | 25.89 | 29.93 | 18.99 | 26.64 | 23.44 | 31.41 |
| Th | 25    | 23.27 | 24.22 | 22.49 | 20.07 | 12.46 | 10.95 | 14.75 | 12.44 | 10.36 | 14.75 | 13.15 | 11.16 | 15.97 | 15.74 | 14.9  |
| U  | 4.241 | 3.495 | 6.94  | 5.09  | 4.38  | 3.92  | 2.78  | 6.39  | 2.78  | 2.31  | 3.33  | 2.86  | 2.84  | 3.5   | 3.72  | 3.36  |

|                      |        |        |        |        |        |       |        |        |        |        |        |        |        |        |        |        |
|----------------------|--------|--------|--------|--------|--------|-------|--------|--------|--------|--------|--------|--------|--------|--------|--------|--------|
| La/Lu                | 119.24 | 124.05 | 89.82  | 97.19  | 106.37 | 42.65 | 83.62  | 205.60 | 87.13  | 103.08 | 100.92 | 124.92 | 83.71  | 103.77 | 84.36  | 92.66  |
| La/Sc                | 4.42   | 4.23   | 3.58   | 6.35   | 3.84   | 1.30  | 4.26   | 9.38   | 4.52   | 4.59   | 5.07   | 4.54   | 3.56   | 3.79   | 4.92   | 4.20   |
| Th/La                | 0.37   | 0.36   | 0.49   | 0.42   | 0.37   | 0.98  | 0.28   | 0.16   | 0.34   | 0.34   | 0.35   | 0.33   | 0.42   | 0.36   | 0.37   | 0.37   |
| Cr/Th                | 2.70   | 2.71   | 2.33   | 1.45   | 4.59   | 3.62  | 3.83   | 2.67   | 5.70   | 5.56   | 3.97   | 3.50   | 5.95   | 4.07   | 6.78   | 4.84   |
| Th/Sc                | 1.64   | 1.55   | 1.76   | 2.66   | 1.43   | 1.27  | 1.21   | 1.49   | 1.56   | 1.54   | 1.79   | 1.51   | 1.48   | 1.37   | 1.80   | 1.55   |
| Co/Th                | 0.16   | 0.19   | 0.30   | 0.28   | 0.12   | 0.99  | 0.58   | 0.44   | 0.65   | 0.50   | 0.44   | 0.52   | 0.48   | 0.44   | 0.50   | 0.50   |
| Cr/Ni                | 6.46   | 6.07   | 2.02   | 2.24   | 3.60   | 2.52  | 2.11   | 2.48   | 2.27   | 2.30   | 2.23   | 2.31   | 2.52   | 2.15   | 2.25   | 2.16   |
| ΣREE                 | 312.76 | 290.89 | 232.38 | 245.05 | 235.47 | 63.22 | 180.88 | 375.93 | 161.44 | 135.85 | 198.09 | 175.95 | 134.88 | 207.65 | 192.13 | 194.20 |
| LREE                 | 283.39 | 265.07 | 209.20 | 221.72 | 213.91 | 54.44 | 159.07 | 351.53 | 144.11 | 122.95 | 178.95 | 160.76 | 121.82 | 188.87 | 171.68 | 174.97 |
| HREE                 | 29.37  | 25.83  | 23.18  | 23.34  | 21.56  | 8.77  | 21.81  | 24.40  | 17.34  | 12.90  | 19.14  | 15.20  | 13.07  | 18.77  | 20.45  | 19.23  |
| (La/Yb) <sub>N</sub> | 12.03  | 12.64  | 9.38   | 10.02  | 10.99  | 4.66  | 8.60   | 21.03  | 9.07   | 10.68  | 10.44  | 12.62  | 8.98   | 10.77  | 8.99   | 9.85   |
| (Gd/Yb) <sub>N</sub> | 2.08   | 2.03   | 1.56   | 1.59   | 1.51   | 0.81  | 1.75   | 2.38   | 1.51   | 1.62   | 1.80   | 1.86   | 1.55   | 1.69   | 1.47   | 1.76   |
| Eu/Eu*               | 0.52   | 0.54   | 0.47   | 0.46   | 0.62   | 0.64  | 0.70   | 0.61   | 0.61   | 0.59   | 0.60   | 0.60   | 0.56   | 0.55   | 0.55   | 0.58   |
| Ce/Ce*               | 0.93   | 0.91   | 0.98   | 0.94   | 0.85   | 1.22  | 0.88   | 0.81   | 0.89   | 0.94   | 0.91   | 0.84   | 1.08   | 1.05   | 0.88   | 0.98   |

---

**Table S3** Lithology and Nd isotopic compositions of samples from Yong'an basin

| Stratigraphy                      | Formation | Location     | Sample No. | Lithology              | $^{143}\text{Nd}/^{144}\text{Nd}$ | 2 $\sigma$ | Epsilon Nd |
|-----------------------------------|-----------|--------------|------------|------------------------|-----------------------------------|------------|------------|
| Late Cretaceous                   | Chong'an  | Shangjiabang | SCA-9      | Argillaceous siltstone | 0.512159                          | 0.000011   | −9.3       |
|                                   |           |              | SCA-7      | Argillaceous siltstone | 0.512173                          | 0.000009   | −9.1       |
|                                   |           |              | SCA-5      | Argillaceous siltstone | 0.512183                          | 0.00001    | −8.9       |
|                                   |           |              | SCA-4      | Fine sandstone         | 0.512165                          | 0.000009   | −9.2       |
|                                   |           |              | SCA-2      | Fine sandstone         | 0.512170                          | 0.000009   | −9.1       |
| Lower Cretaceous-Upper Cretaceous | Shaxian   | Shangjiabang | SSX-24     | Argillaceous siltstone | 0.512198                          | 0.000009   | −8.6       |
|                                   |           |              | SSX-20     | Argillaceous siltstone | 0.512186                          | 0.00001    | −8.8       |
|                                   |           |              | SSX-14     | Siltstone              | 0.512201                          | 0.00001    | −8.5       |
|                                   |           |              | SSX-11     | Siltstone              | 0.512213                          | 0.000011   | −8.3       |
|                                   |           |              | SSX-7      | Fine sandstone         | 0.512253                          | 0.00001    | −7.5       |
|                                   |           |              | SSX-4      | Fine sandstone         | 0.512208                          | 0.000011   | −8.4       |
| Lower Cretaceous                  | Bantou    | Yong'an      | JS- 10     | Mudstone               | 0.511880                          | 0.000012   | −14.8      |
|                                   |           |              | JS- 6      | Mud shale              | 0.51200                           | 0.000009   | −12.4      |
|                                   |           |              | JS- 4      | Mud shale              | 0.511988                          | 0.00001    | −12.7      |
| Middle Jurassic                   | Zhangping | Zhangping    | ZPD-7      | Mudstone               | 0.511809                          | 0.000011   | −16.2      |
|                                   |           |              | ZPD-2      | Mudstone               | 0.511772                          | 0.00001    | −16.9      |

**Table S4** Detrital zircon U-Pb geochronology of samples from Yong'an basin**Sample SSX-8 from the late Early Cretaceous Shaxian Formation**

| Spots    | Th<br>(ppm) | U<br>(ppm) | Th/U | <sup>207</sup> Pb/ <sup>206</sup> Pb |       | <sup>207</sup> Pb/ <sup>235</sup> U |       | <sup>206</sup> Pb/ <sup>238</sup> U |        | rho   | <sup>207</sup> Pb/ <sup>206</sup> Pb |         | <sup>207</sup> Pb/ <sup>235</sup> U |        | <sup>206</sup> Pb/ <sup>238</sup> U |       | Concord<br>ance |
|----------|-------------|------------|------|--------------------------------------|-------|-------------------------------------|-------|-------------------------------------|--------|-------|--------------------------------------|---------|-------------------------------------|--------|-------------------------------------|-------|-----------------|
|          |             |            |      | Ratio                                | 1σ    | Ratio                               | 1σ    | Ratio                               | 1σ     |       | Age(Ma)                              | 1σ      | Age(Ma)                             | 1σ     | Age(Ma)                             | 1σ    |                 |
| SSX-8-01 | 188         | 338        | 0.56 | 0.054                                | 0.002 | 0.154                               | 0.005 | 0.021                               | 0.0003 | 0.346 | 369                                  | 87.955  | 145                                 | 4.729  | 133                                 | 1.590 | 91%             |
| SSX-8-02 | 456         | 394        | 1.16 | 0.053                                | 0.002 | 0.128                               | 0.005 | 0.018                               | 0.0003 | 0.426 | 320                                  | 88.880  | 123                                 | 4.390  | 114                                 | 1.832 | 92%             |
| SSX-8-03 | 277         | 300        | 0.93 | 0.047                                | 0.002 | 0.134                               | 0.007 | 0.021                               | 0.0003 | 0.297 | 64.9                                 | 124.060 | 128                                 | 5.876  | 132                                 | 1.895 | 96%             |
| SSX-8-04 | 338         | 805        | 0.42 | 0.053                                | 0.001 | 0.149                               | 0.004 | 0.020                               | 0.0002 | 0.484 | 322                                  | 51.848  | 141                                 | 3.299  | 130                                 | 1.567 | 92%             |
| SSX-8-05 | 123         | 122        | 1.01 | 0.052                                | 0.003 | 0.141                               | 0.007 | 0.020                               | 0.0003 | 0.322 | 295                                  | 122.205 | 134                                 | 6.587  | 126                                 | 2.120 | 94%             |
| SSX-8-06 | 280         | 361        | 0.78 | 0.048                                | 0.002 | 0.154                               | 0.005 | 0.023                               | 0.0003 | 0.382 | 79.7                                 | 81.475  | 145                                 | 4.834  | 149                                 | 2.012 | 97%             |
| SSX-8-07 | 426         | 497        | 0.86 | 0.051                                | 0.002 | 0.126                               | 0.004 | 0.018                               | 0.0002 | 0.410 | 261                                  | 74.988  | 120                                 | 3.795  | 114                                 | 1.549 | 94%             |
| SSX-8-08 | 85.9        | 87.5       | 0.98 | 0.077                                | 0.006 | 0.222                               | 0.014 | 0.022                               | 0.0005 | 0.379 | 1131                                 | 147.220 | 203                                 | 11.257 | 142                                 | 3.251 | 64%             |
| SSX-8-09 | 440         | 364        | 1.21 | 0.049                                | 0.002 | 0.123                               | 0.005 | 0.019                               | 0.0003 | 0.434 | 132                                  | 88.878  | 118                                 | 4.250  | 118                                 | 1.944 | 99%             |
| SSX-8-10 | 180         | 208        | 0.86 | 0.050                                | 0.003 | 0.119                               | 0.006 | 0.018                               | 0.0003 | 0.349 | 189                                  | 118.503 | 114                                 | 5.014  | 114                                 | 1.825 | 99%             |
| SSX-8-11 | 106         | 131        | 0.81 | 0.053                                | 0.003 | 0.125                               | 0.006 | 0.018                               | 0.0003 | 0.375 | 309                                  | 129.613 | 120                                 | 5.853  | 114                                 | 2.199 | 95%             |
| SSX-8-12 | 282         | 493        | 0.57 | 0.051                                | 0.001 | 0.169                               | 0.005 | 0.024                               | 0.0003 | 0.481 | 235                                  | 61.100  | 158                                 | 4.019  | 153                                 | 1.998 | 96%             |
| SSX-8-13 | 183         | 250        | 0.73 | 0.049                                | 0.002 | 0.158                               | 0.007 | 0.023                               | 0.0004 | 0.356 | 150                                  | 96.283  | 149                                 | 5.966  | 149                                 | 2.258 | 99%             |
| SSX-8-14 | 181         | 253        | 0.71 | 0.052                                | 0.002 | 0.126                               | 0.006 | 0.018                               | 0.0003 | 0.339 | 287                                  | 105.540 | 120                                 | 5.168  | 113                                 | 1.730 | 93%             |
| SSX-8-15 | 157         | 176        | 0.89 | 0.052                                | 0.003 | 0.120                               | 0.007 | 0.017                               | 0.0003 | 0.353 | 265                                  | 131.463 | 115                                 | 5.902  | 110                                 | 2.098 | 95%             |
| SSX-8-16 | 332         | 479        | 0.69 | 0.051                                | 0.002 | 0.135                               | 0.006 | 0.019                               | 0.0004 | 0.445 | 257                                  | 91.653  | 129                                 | 5.069  | 124                                 | 2.282 | 95%             |
| SSX-8-17 | 192         | 312        | 0.62 | 0.071                                | 0.003 | 0.202                               | 0.009 | 0.021                               | 0.0004 | 0.377 | 965                                  | 85.958  | 187                                 | 7.965  | 131                                 | 2.285 | 65%             |
| SSX-8-18 | 186         | 351        | 0.53 | 0.050                                | 0.002 | 0.162                               | 0.005 | 0.024                               | 0.0004 | 0.477 | 198                                  | 77.765  | 152                                 | 4.653  | 151                                 | 2.350 | 99%             |
| SSX-8-19 | 159         | 315        | 0.51 | 0.050                                | 0.002 | 0.158                               | 0.006 | 0.023                               | 0.0003 | 0.372 | 211                                  | 95.355  | 149                                 | 5.621  | 147                                 | 2.186 | 98%             |
| SSX-8-20 | 358         | 563        | 0.64 | 0.048                                | 0.001 | 0.153                               | 0.004 | 0.023                               | 0.0003 | 0.516 | 120                                  | 62.030  | 144                                 | 3.792  | 145                                 | 2.085 | 99%             |

|          |      |      |      |       |       |       |       |       |        |       |      |         |     |        |     |       |     |
|----------|------|------|------|-------|-------|-------|-------|-------|--------|-------|------|---------|-----|--------|-----|-------|-----|
| SSX-8-21 | 231  | 291  | 0.79 | 0.049 | 0.002 | 0.135 | 0.006 | 0.020 | 0.0003 | 0.316 | 143  | 112.020 | 128 | 5.518  | 128 | 1.840 | 99% |
| SSX-8-22 | 372  | 504  | 0.74 | 0.050 | 0.001 | 0.125 | 0.003 | 0.018 | 0.0002 | 0.464 | 183  | 63.878  | 120 | 3.154  | 117 | 1.506 | 97% |
| SSX-8-23 | 230  | 331  | 0.70 | 0.053 | 0.002 | 0.159 | 0.005 | 0.022 | 0.0003 | 0.357 | 324  | 112.025 | 149 | 4.820  | 139 | 1.707 | 92% |
| SSX-8-24 | 238  | 345  | 0.69 | 0.053 | 0.002 | 0.168 | 0.005 | 0.023 | 0.0003 | 0.489 | 324  | 66.660  | 158 | 4.334  | 147 | 2.115 | 93% |
| SSX-8-25 | 335  | 310  | 1.08 | 0.052 | 0.002 | 0.157 | 0.007 | 0.022 | 0.0004 | 0.366 | 287  | 100.910 | 148 | 6.342  | 142 | 2.365 | 95% |
| SSX-8-26 | 266  | 446  | 0.60 | 0.055 | 0.002 | 0.185 | 0.005 | 0.025 | 0.0003 | 0.427 | 394  | 68.513  | 172 | 4.475  | 157 | 1.877 | 90% |
| SSX-8-27 | 442  | 452  | 0.98 | 0.086 | 0.007 | 0.256 | 0.035 | 0.018 | 0.0005 | 0.223 | 1343 | 152.315 | 232 | 28.265 | 114 | 3.442 | 31% |
| SSX-8-28 | 127  | 141  | 0.90 | 0.055 | 0.003 | 0.147 | 0.008 | 0.020 | 0.0004 | 0.320 | 413  | 160.168 | 139 | 7.200  | 127 | 2.230 | 90% |
| SSX-8-29 | 243  | 339  | 0.72 | 0.049 | 0.002 | 0.124 | 0.005 | 0.019 | 0.0003 | 0.338 | 146  | 99.985  | 119 | 4.774  | 119 | 1.692 | 99% |
| SSX-8-30 | 95.3 | 370  | 0.26 | 0.050 | 0.002 | 0.218 | 0.009 | 0.031 | 0.0005 | 0.393 | 213  | 85.173  | 200 | 7.289  | 200 | 3.110 | 99% |
| SSX-8-31 | 416  | 318  | 1.31 | 0.050 | 0.002 | 0.150 | 0.006 | 0.022 | 0.0003 | 0.410 | 213  | 87.025  | 142 | 5.038  | 139 | 2.139 | 97% |
| SSX-8-32 | 236  | 324  | 0.73 | 0.049 | 0.002 | 0.114 | 0.005 | 0.017 | 0.0003 | 0.355 | 132  | 99.985  | 109 | 4.383  | 109 | 1.628 | 99% |
| SSX-8-33 | 277  | 311  | 0.89 | 0.052 | 0.003 | 0.179 | 0.016 | 0.026 | 0.0016 | 0.709 | 283  | 114.798 | 167 | 13.507 | 163 | 9.969 | 97% |
| SSX-8-34 | 185  | 182  | 1.02 | 0.060 | 0.003 | 0.163 | 0.009 | 0.020 | 0.0004 | 0.346 | 587  | 118.500 | 153 | 7.888  | 127 | 2.420 | 81% |
| SSX-8-35 | 161  | 174  | 0.93 | 0.054 | 0.003 | 0.134 | 0.007 | 0.018 | 0.0003 | 0.341 | 389  | 124.988 | 128 | 6.247  | 118 | 2.082 | 92% |
| SSX-8-36 | 172  | 383  | 0.45 | 0.051 | 0.002 | 0.157 | 0.005 | 0.022 | 0.0003 | 0.436 | 239  | 78.690  | 148 | 4.437  | 143 | 1.979 | 96% |
| SSX-8-37 | 156  | 232  | 0.67 | 0.052 | 0.002 | 0.125 | 0.006 | 0.018 | 0.0003 | 0.348 | 333  | 104.615 | 120 | 5.236  | 115 | 1.845 | 96% |
| SSX-8-38 | 258  | 233  | 1.11 | 0.050 | 0.003 | 0.113 | 0.006 | 0.017 | 0.0003 | 0.313 | 172  | 122.205 | 108 | 5.051  | 108 | 1.647 | 99% |
| SSX-8-39 | 187  | 204  | 0.92 | 0.053 | 0.003 | 0.121 | 0.006 | 0.017 | 0.0003 | 0.349 | 332  | 112.950 | 116 | 4.994  | 107 | 1.698 | 92% |
| SSX-8-40 | 165  | 184  | 0.90 | 0.049 | 0.003 | 0.115 | 0.006 | 0.017 | 0.0003 | 0.347 | 128  | 122.200 | 111 | 5.397  | 111 | 1.959 | 99% |
| SSX-8-41 | 145  | 139  | 1.04 | 0.050 | 0.003 | 0.137 | 0.007 | 0.020 | 0.0004 | 0.372 | 213  | 130.538 | 130 | 6.260  | 129 | 2.430 | 98% |
| SSX-8-42 | 187  | 173  | 1.08 | 0.055 | 0.003 | 0.128 | 0.006 | 0.017 | 0.0003 | 0.349 | 394  | 114.803 | 122 | 5.544  | 111 | 1.844 | 90% |
| SSX-8-43 | 153  | 302  | 0.51 | 0.051 | 0.002 | 0.161 | 0.006 | 0.023 | 0.0004 | 0.454 | 243  | 78.690  | 151 | 4.973  | 147 | 2.334 | 97% |
| SSX-8-44 | 102  | 124  | 0.82 | 0.073 | 0.004 | 0.202 | 0.013 | 0.020 | 0.0004 | 0.304 | 1033 | 120.373 | 187 | 11.014 | 126 | 2.454 | 61% |
| SSX-8-45 | 685  | 1173 | 0.58 | 0.051 | 0.001 | 0.121 | 0.003 | 0.017 | 0.0002 | 0.537 | 256  | 53.695  | 116 | 2.326  | 110 | 1.244 | 94% |
| SSX-8-46 | 274  | 415  | 0.66 | 0.049 | 0.002 | 0.161 | 0.006 | 0.024 | 0.0004 | 0.461 | 132  | 77.765  | 151 | 4.863  | 153 | 2.413 | 98% |



|          |      |      |      |       |       |       |       |       |        |       |      |         |     |        |     |       |     |
|----------|------|------|------|-------|-------|-------|-------|-------|--------|-------|------|---------|-----|--------|-----|-------|-----|
| SSX-8-47 | 123  | 183  | 0.67 | 0.050 | 0.002 | 0.149 | 0.006 | 0.022 | 0.0003 | 0.328 | 191  | 105.540 | 141 | 5.707  | 138 | 1.942 | 97% |
| SSX-8-48 | 159  | 263  | 0.60 | 0.049 | 0.002 | 0.138 | 0.005 | 0.021 | 0.0004 | 0.451 | 150  | 94.430  | 131 | 4.749  | 131 | 2.262 | 99% |
| SSX-8-49 | 715  | 529  | 1.35 | 0.050 | 0.002 | 0.150 | 0.004 | 0.022 | 0.0002 | 0.377 | 191  | 72.210  | 142 | 3.946  | 139 | 1.550 | 98% |
| SSX-8-50 | 269  | 445  | 0.60 | 0.049 | 0.002 | 0.156 | 0.005 | 0.023 | 0.0003 | 0.392 | 161  | 79.618  | 147 | 4.433  | 147 | 1.847 | 99% |
| SSX-8-51 | 236  | 482  | 0.49 | 0.051 | 0.001 | 0.172 | 0.005 | 0.025 | 0.0003 | 0.390 | 228  | 63.878  | 161 | 4.435  | 156 | 1.793 | 96% |
| SSX-8-52 | 305  | 261  | 1.17 | 0.049 | 0.002 | 0.117 | 0.005 | 0.017 | 0.0003 | 0.332 | 150  | 112.945 | 112 | 4.672  | 112 | 1.613 | 99% |
| SSX-8-53 | 317  | 373  | 0.85 | 0.135 | 0.007 | 0.429 | 0.029 | 0.021 | 0.0004 | 0.307 | 2168 | 95.532  | 362 | 20.546 | 133 | 2.729 | 7%  |
| SSX-8-54 | 147  | 244  | 0.60 | 0.049 | 0.002 | 0.118 | 0.005 | 0.018 | 0.0002 | 0.330 | 150  | 111.095 | 113 | 4.601  | 112 | 1.576 | 99% |
| SSX-8-55 | 333  | 574  | 0.58 | 0.049 | 0.001 | 0.157 | 0.005 | 0.023 | 0.0003 | 0.360 | 132  | 76.843  | 148 | 4.343  | 148 | 1.657 | 99% |
| SSX-8-56 | 139  | 200  | 0.70 | 0.055 | 0.002 | 0.168 | 0.007 | 0.022 | 0.0004 | 0.379 | 406  | 87.955  | 158 | 6.074  | 143 | 2.226 | 90% |
| SSX-8-57 | 333  | 184  | 1.81 | 0.051 | 0.003 | 0.141 | 0.007 | 0.020 | 0.0003 | 0.321 | 254  | 122.205 | 134 | 6.281  | 130 | 2.058 | 96% |
| SSX-8-58 | 181  | 279  | 0.65 | 0.052 | 0.002 | 0.124 | 0.005 | 0.018 | 0.0003 | 0.349 | 272  | 98.133  | 119 | 4.717  | 113 | 1.647 | 95% |
| SSX-8-59 | 200  | 300  | 0.67 | 0.053 | 0.002 | 0.130 | 0.006 | 0.018 | 0.0003 | 0.333 | 317  | 94.435  | 124 | 5.290  | 112 | 1.687 | 90% |
| SSX-8-60 | 456  | 376  | 1.22 | 0.054 | 0.002 | 0.151 | 0.006 | 0.020 | 0.0003 | 0.389 | 391  | 91.658  | 143 | 5.205  | 130 | 1.956 | 90% |
| SSX-8-61 | 534  | 255  | 2.09 | 0.050 | 0.002 | 0.118 | 0.005 | 0.017 | 0.0003 | 0.333 | 209  | 101.838 | 114 | 4.716  | 110 | 1.592 | 96% |
| SSX-8-62 | 148  | 194  | 0.76 | 0.074 | 0.005 | 0.178 | 0.012 | 0.017 | 0.0004 | 0.300 | 1050 | 133.798 | 166 | 10.495 | 111 | 2.260 | 60% |
| SSX-8-63 | 176  | 191  | 0.92 | 0.052 | 0.002 | 0.160 | 0.007 | 0.023 | 0.0004 | 0.353 | 276  | 110.170 | 151 | 6.283  | 145 | 2.271 | 96% |
| SSX-8-64 | 365  | 888  | 0.41 | 0.052 | 0.001 | 0.159 | 0.004 | 0.022 | 0.0003 | 0.473 | 276  | 57.400  | 150 | 3.428  | 142 | 1.640 | 94% |
| SSX-8-65 | 264  | 197  | 1.34 | 0.054 | 0.002 | 0.152 | 0.006 | 0.021 | 0.0003 | 0.373 | 365  | 98.138  | 143 | 5.418  | 132 | 1.979 | 91% |
| SSX-8-66 | 273  | 526  | 0.52 | 0.047 | 0.002 | 0.134 | 0.005 | 0.021 | 0.0003 | 0.366 | 35.3 | 88.880  | 128 | 4.400  | 132 | 1.756 | 96% |
| SSX-8-67 | 36.6 | 51.3 | 0.71 | 0.068 | 0.007 | 0.176 | 0.013 | 0.022 | 0.0006 | 0.391 | 857  | 209.255 | 165 | 11.049 | 139 | 3.912 | 83% |
| SSX-8-68 | 152  | 179  | 0.85 | 0.049 | 0.002 | 0.137 | 0.006 | 0.020 | 0.0003 | 0.314 | 165  | 108.318 | 130 | 5.799  | 130 | 1.906 | 99% |
| SSX-8-69 | 235  | 459  | 0.51 | 0.053 | 0.002 | 0.156 | 0.005 | 0.021 | 0.0003 | 0.368 | 345  | 77.770  | 147 | 4.450  | 136 | 1.613 | 92% |
| SSX-8-70 | 166  | 244  | 0.68 | 0.051 | 0.002 | 0.125 | 0.005 | 0.018 | 0.0003 | 0.407 | 254  | 99.985  | 120 | 4.595  | 115 | 1.892 | 96% |
| SSX-8-71 | 224  | 519  | 0.43 | 0.049 | 0.001 | 0.164 | 0.005 | 0.024 | 0.0003 | 0.440 | 167  | 69.433  | 154 | 4.055  | 153 | 1.892 | 99% |
| SSX-8-72 | 98.8 | 109  | 0.90 | 0.048 | 0.003 | 0.128 | 0.007 | 0.020 | 0.0004 | 0.341 | 94.5 | 140.715 | 123 | 6.246  | 128 | 2.341 | 95% |

|                                                               |     |     |      |       |       |       |       |       |        |       |      |         |     |        |     |       |     |
|---------------------------------------------------------------|-----|-----|------|-------|-------|-------|-------|-------|--------|-------|------|---------|-----|--------|-----|-------|-----|
| SSX-8-73                                                      | 233 | 362 | 0.64 | 0.049 | 0.002 | 0.164 | 0.006 | 0.024 | 0.0003 | 0.400 | 169  | 86.098  | 154 | 5.128  | 154 | 2.180 | 99% |
| SSX-8-74                                                      | 390 | 352 | 1.11 | 0.049 | 0.002 | 0.115 | 0.005 | 0.017 | 0.0003 | 0.340 | 150  | 105.540 | 111 | 4.515  | 110 | 1.595 | 99% |
| SSX-8-75                                                      | 472 | 493 | 0.96 | 0.049 | 0.001 | 0.156 | 0.004 | 0.023 | 0.0003 | 0.454 | 132  | 59.253  | 147 | 3.653  | 147 | 1.761 | 99% |
| SSX-8-76                                                      | 137 | 192 | 0.72 | 0.050 | 0.003 | 0.121 | 0.006 | 0.017 | 0.0003 | 0.364 | 198  | 123.130 | 116 | 5.511  | 111 | 2.016 | 95% |
| SSX-8-77                                                      | 152 | 267 | 0.57 | 0.084 | 0.004 | 0.294 | 0.017 | 0.024 | 0.0004 | 0.304 | 1303 | 72.223  | 262 | 13.524 | 153 | 2.690 | 47% |
| SSX-8-78                                                      | 116 | 110 | 1.05 | 0.074 | 0.004 | 0.209 | 0.011 | 0.021 | 0.0004 | 0.335 | 1031 | 116.670 | 193 | 9.143  | 134 | 2.320 | 64% |
| SSX-8-79                                                      | 439 | 299 | 1.47 | 0.053 | 0.002 | 0.122 | 0.006 | 0.017 | 0.0003 | 0.343 | 309  | 99.063  | 117 | 4.985  | 109 | 1.662 | 92% |
| SSX-8-80                                                      | 181 | 173 | 1.04 | 0.086 | 0.006 | 0.286 | 0.024 | 0.022 | 0.0005 | 0.253 | 1347 | 135.188 | 255 | 18.612 | 141 | 2.919 | 42% |
| SSX-8-81                                                      | 286 | 338 | 0.84 | 0.049 | 0.002 | 0.118 | 0.004 | 0.018 | 0.0003 | 0.462 | 139  | 79.620  | 113 | 3.582  | 113 | 1.725 | 99% |
| SSX-8-82                                                      | 177 | 175 | 1.01 | 0.065 | 0.003 | 0.183 | 0.010 | 0.020 | 0.0004 | 0.342 | 789  | 109.250 | 170 | 8.645  | 129 | 2.399 | 71% |
| SSX-8-83                                                      | 360 | 648 | 0.56 | 0.051 | 0.001 | 0.166 | 0.004 | 0.024 | 0.0003 | 0.530 | 243  | 57.398  | 156 | 3.848  | 150 | 2.093 | 96% |
| SSX-8-84                                                      | 166 | 184 | 0.90 | 0.051 | 0.002 | 0.142 | 0.006 | 0.021 | 0.0004 | 0.430 | 228  | 105.540 | 135 | 5.420  | 132 | 2.409 | 97% |
| SSX-8-85                                                      | 145 | 167 | 0.87 | 0.051 | 0.003 | 0.124 | 0.006 | 0.018 | 0.0003 | 0.340 | 228  | 120.355 | 119 | 5.768  | 115 | 1.993 | 96% |
| SSX-8-86                                                      | 205 | 257 | 0.80 | 0.054 | 0.002 | 0.168 | 0.007 | 0.023 | 0.0004 | 0.406 | 354  | 85.175  | 157 | 5.727  | 144 | 2.266 | 90% |
| SSX-8-87                                                      | 310 | 633 | 0.49 | 0.051 | 0.001 | 0.161 | 0.005 | 0.023 | 0.0003 | 0.395 | 250  | 67.580  | 152 | 3.976  | 144 | 1.592 | 95% |
| SSX-8-88                                                      | 166 | 168 | 0.99 | 0.065 | 0.003 | 0.183 | 0.009 | 0.021 | 0.0004 | 0.392 | 772  | 103.693 | 170 | 7.870  | 132 | 2.575 | 74% |
| SSX-8-89                                                      | 125 | 138 | 0.90 | 0.054 | 0.003 | 0.125 | 0.008 | 0.017 | 0.0003 | 0.317 | 365  | 144.428 | 120 | 6.828  | 111 | 2.110 | 92% |
| SSX-8-90                                                      | 312 | 249 | 1.25 | 0.052 | 0.002 | 0.150 | 0.007 | 0.021 | 0.0004 | 0.394 | 300  | 102.763 | 142 | 6.230  | 134 | 2.453 | 94% |
| <b>Sample JS-2 from the Early Cretaceous Bantou Formation</b> |     |     |      |       |       |       |       |       |        |       |      |         |     |        |     |       |     |
| JS-2-1                                                        | 175 | 317 | 0.55 | 0.049 | 0.002 | 0.171 | 0.006 | 0.025 | 0.0004 | 0.401 | 143  | 79.618  | 160 | 5.410  | 160 | 2.311 | 99% |
| JS-2-2                                                        | 197 | 182 | 1.08 | 0.050 | 0.002 | 0.164 | 0.007 | 0.024 | 0.0003 | 0.309 | 187  | 111.095 | 154 | 6.494  | 153 | 2.127 | 99% |
| JS-2-3                                                        | 381 | 346 | 1.10 | 0.051 | 0.002 | 0.170 | 0.006 | 0.025 | 0.0003 | 0.346 | 235  | 88.875  | 160 | 5.254  | 157 | 1.909 | 98% |
| JS-2-4                                                        | 831 | 890 | 0.93 | 0.049 | 0.001 | 0.184 | 0.005 | 0.027 | 0.0003 | 0.374 | 167  | 53.695  | 172 | 3.959  | 171 | 1.588 | 99% |
| JS-2-5                                                        | 138 | 134 | 1.03 | 0.049 | 0.003 | 0.156 | 0.009 | 0.023 | 0.0004 | 0.299 | 167  | 133.315 | 147 | 7.669  | 147 | 2.436 | 99% |
| JS-2-6                                                        | 189 | 236 | 0.80 | 0.054 | 0.002 | 0.177 | 0.007 | 0.024 | 0.0003 | 0.356 | 387  | 89.805  | 166 | 6.246  | 151 | 2.167 | 90% |
| JS-2-7                                                        | 188 | 168 | 1.12 | 0.055 | 0.003 | 0.184 | 0.009 | 0.025 | 0.0004 | 0.321 | 394  | 114.803 | 172 | 7.708  | 159 | 2.466 | 92% |

|         |      |      |      |       |       |       |       |       |        |       |      |         |      |        |      |        |     |
|---------|------|------|------|-------|-------|-------|-------|-------|--------|-------|------|---------|------|--------|------|--------|-----|
| JS-2-8  | 304  | 355  | 0.86 | 0.051 | 0.002 | 0.177 | 0.006 | 0.025 | 0.0003 | 0.359 | 233  | 85.173  | 165  | 5.405  | 162  | 2.039  | 98% |
| JS-2-9  | 148  | 135  | 1.10 | 0.064 | 0.002 | 0.648 | 0.023 | 0.074 | 0.0010 | 0.380 | 743  | 75.918  | 507  | 13.905 | 460  | 5.879  | 90% |
| JS-2-10 | 180  | 177  | 1.02 | 0.053 | 0.002 | 0.200 | 0.009 | 0.028 | 0.0008 | 0.586 | 322  | 98.138  | 185  | 7.872  | 177  | 4.777  | 95% |
| JS-2-11 | 129  | 163  | 0.79 | 0.049 | 0.002 | 0.184 | 0.008 | 0.027 | 0.0004 | 0.357 | 143  | 96.280  | 171  | 6.846  | 174  | 2.655  | 98% |
| JS-2-12 | 57.1 | 70.9 | 0.81 | 0.057 | 0.004 | 0.242 | 0.013 | 0.032 | 0.0007 | 0.370 | 494  | 157.388 | 220  | 10.968 | 205  | 4.148  | 93% |
| JS-2-13 | 137  | 182  | 0.75 | 0.077 | 0.002 | 1.776 | 0.034 | 0.168 | 0.0019 | 0.593 | 1128 | 41.820  | 1037 | 12.363 | 999  | 10.435 | 96% |
| JS-2-14 | 79.1 | 109  | 0.72 | 0.051 | 0.003 | 0.175 | 0.010 | 0.026 | 0.0005 | 0.327 | 235  | 142.573 | 164  | 8.455  | 163  | 2.946  | 99% |
| JS-2-15 | 3.99 | 167  | 0.02 | 0.051 | 0.002 | 0.312 | 0.013 | 0.045 | 0.0008 | 0.425 | 250  | 96.283  | 276  | 9.930  | 283  | 4.835  | 97% |
| JS-2-16 | 103  | 140  | 0.73 | 0.061 | 0.002 | 0.588 | 0.020 | 0.071 | 0.0011 | 0.462 | 635  | 77.765  | 470  | 12.606 | 441  | 6.601  | 93% |
| JS-2-17 | 175  | 168  | 1.04 | 0.050 | 0.002 | 0.169 | 0.007 | 0.025 | 0.0004 | 0.361 | 187  | 99.985  | 158  | 6.173  | 159  | 2.380  | 99% |
| JS-2-18 | 74.6 | 410  | 0.18 | 0.059 | 0.002 | 0.547 | 0.021 | 0.066 | 0.0010 | 0.375 | 554  | 64.803  | 443  | 13.751 | 414  | 5.766  | 93% |
| JS-2-19 | 134  | 167  | 0.80 | 0.053 | 0.002 | 0.182 | 0.008 | 0.025 | 0.0004 | 0.338 | 343  | 96.285  | 170  | 6.516  | 160  | 2.224  | 93% |
| JS-2-20 | 236  | 279  | 0.85 | 0.049 | 0.002 | 0.165 | 0.005 | 0.024 | 0.0003 | 0.327 | 161  | 79.618  | 155  | 4.715  | 155  | 1.647  | 99% |
| JS-2-21 | 176  | 369  | 0.48 | 0.051 | 0.001 | 0.299 | 0.009 | 0.042 | 0.0006 | 0.456 | 257  | 61.100  | 265  | 7.087  | 265  | 3.599  | 99% |
| JS-2-22 | 281  | 299  | 0.94 | 0.049 | 0.002 | 0.170 | 0.005 | 0.025 | 0.0003 | 0.417 | 169  | 69.433  | 159  | 4.590  | 159  | 2.044  | 99% |
| JS-2-23 | 121  | 167  | 0.73 | 0.049 | 0.002 | 0.152 | 0.007 | 0.023 | 0.0003 | 0.312 | 154  | 107.390 | 144  | 6.004  | 144  | 1.992  | 99% |
| JS-2-24 | 186  | 225  | 0.83 | 0.050 | 0.002 | 0.171 | 0.007 | 0.025 | 0.0003 | 0.332 | 198  | 97.208  | 160  | 6.194  | 160  | 2.195  | 99% |
| JS-2-25 | 67.3 | 122  | 0.55 | 0.109 | 0.002 | 4.856 | 0.095 | 0.321 | 0.0034 | 0.544 | 1791 | 27.007  | 1795 | 16.493 | 1794 | 16.685 | 99% |
| JS-2-26 | 207  | 216  | 0.96 | 0.050 | 0.002 | 0.173 | 0.008 | 0.025 | 0.0004 | 0.323 | 191  | 108.318 | 162  | 6.599  | 161  | 2.273  | 99% |
| JS-2-27 | 232  | 179  | 1.30 | 0.055 | 0.003 | 0.194 | 0.010 | 0.026 | 0.0003 | 0.257 | 398  | 116.655 | 180  | 8.319  | 165  | 2.111  | 91% |
| JS-2-29 | 186  | 196  | 0.95 | 0.050 | 0.002 | 0.179 | 0.007 | 0.026 | 0.0004 | 0.398 | 209  | 87.950  | 167  | 5.795  | 167  | 2.469  | 99% |
| JS-2-30 | 184  | 179  | 1.02 | 0.047 | 0.002 | 0.164 | 0.007 | 0.026 | 0.0004 | 0.324 | 33.4 | 166.645 | 154  | 6.016  | 165  | 2.220  | 93% |
| JS-2-31 | 193  | 209  | 0.92 | 0.052 | 0.002 | 0.191 | 0.008 | 0.027 | 0.0004 | 0.333 | 276  | 89.800  | 178  | 6.827  | 171  | 2.346  | 95% |
| JS-2-32 | 222  | 240  | 0.93 | 0.049 | 0.002 | 0.160 | 0.006 | 0.024 | 0.0003 | 0.360 | 161  | 96.283  | 151  | 5.430  | 152  | 2.091  | 99% |
| JS-2-33 | 92.6 | 133  | 0.70 | 0.048 | 0.002 | 0.231 | 0.010 | 0.035 | 0.0005 | 0.336 | 98   | 112.945 | 211  | 8.517  | 223  | 3.300  | 94% |
| JS-2-34 | 203  | 622  | 0.33 | 0.057 | 0.001 | 0.564 | 0.011 | 0.072 | 0.0008 | 0.533 | 472  | 45.365  | 454  | 7.162  | 449  | 4.520  | 98% |

|         |      |     |      |       |       |       |       |       |        |       |      |         |      |        |      |        |     |
|---------|------|-----|------|-------|-------|-------|-------|-------|--------|-------|------|---------|------|--------|------|--------|-----|
| JS-2-35 | 102  | 401 | 0.25 | 0.054 | 0.001 | 0.388 | 0.010 | 0.052 | 0.0005 | 0.400 | 361  | 55.550  | 333  | 7.405  | 328  | 3.336  | 98% |
| JS-2-36 | 202  | 186 | 1.09 | 0.050 | 0.002 | 0.180 | 0.009 | 0.026 | 0.0004 | 0.304 | 189  | 109.243 | 168  | 7.555  | 168  | 2.461  | 99% |
| JS-2-37 | 44.8 | 398 | 0.11 | 0.138 | 0.002 | 6.791 | 0.116 | 0.355 | 0.0032 | 0.521 | 2198 | 30.403  | 2085 | 15.246 | 1959 | 15.140 | 93% |
| JS-2-39 | 266  | 248 | 1.07 | 0.050 | 0.002 | 0.187 | 0.007 | 0.027 | 0.0003 | 0.341 | 191  | 90.725  | 174  | 5.904  | 174  | 2.163  | 99% |
| JS-2-40 | 119  | 144 | 0.83 | 0.051 | 0.003 | 0.180 | 0.009 | 0.026 | 0.0004 | 0.297 | 220  | 122.205 | 168  | 7.477  | 166  | 2.348  | 98% |
| JS-2-41 | 271  | 330 | 0.82 | 0.050 | 0.002 | 0.181 | 0.006 | 0.026 | 0.0003 | 0.375 | 176  | 76.840  | 169  | 5.385  | 168  | 2.164  | 99% |
| JS-2-43 | 87.4 | 105 | 0.83 | 0.052 | 0.003 | 0.186 | 0.010 | 0.026 | 0.0005 | 0.384 | 298  | 125.910 | 173  | 8.421  | 167  | 3.353  | 96% |
| JS-2-44 | 294  | 877 | 0.33 | 0.051 | 0.001 | 0.181 | 0.005 | 0.025 | 0.0003 | 0.420 | 261  | 54.623  | 169  | 4.058  | 162  | 1.753  | 95% |
| JS-2-45 | 185  | 203 | 0.91 | 0.052 | 0.002 | 0.192 | 0.009 | 0.027 | 0.0004 | 0.342 | 300  | 103.688 | 178  | 7.494  | 171  | 2.647  | 95% |
| JS-2-46 | 241  | 292 | 0.83 | 0.115 | 0.002 | 5.065 | 0.073 | 0.318 | 0.0021 | 0.455 | 1877 | 26.540  | 1830 | 12.315 | 1782 | 10.292 | 97% |
| JS-2-47 | 151  | 557 | 0.27 | 0.053 | 0.001 | 0.297 | 0.008 | 0.040 | 0.0007 | 0.615 | 343  | 47.218  | 264  | 6.293  | 254  | 4.143  | 96% |
| JS-2-48 | 195  | 219 | 0.89 | 0.051 | 0.002 | 0.156 | 0.006 | 0.023 | 0.0005 | 0.566 | 220  | 99.985  | 147  | 5.624  | 146  | 3.346  | 99% |
| JS-2-49 | 305  | 354 | 0.86 | 0.051 | 0.002 | 0.179 | 0.007 | 0.026 | 0.0004 | 0.364 | 256  | 95.355  | 167  | 5.912  | 163  | 2.245  | 97% |
| JS-2-50 | 168  | 249 | 0.68 | 0.115 | 0.002 | 4.528 | 0.087 | 0.285 | 0.0034 | 0.630 | 1876 | 30.708  | 1736 | 15.988 | 1616 | 17.291 | 92% |
| JS-2-51 | 248  | 195 | 1.27 | 0.056 | 0.002 | 0.422 | 0.013 | 0.055 | 0.0006 | 0.365 | 443  | 68.513  | 358  | 8.978  | 345  | 3.657  | 96% |
| JS-2-52 | 220  | 179 | 1.23 | 0.050 | 0.003 | 0.167 | 0.008 | 0.025 | 0.0003 | 0.296 | 209  | 120.353 | 157  | 6.864  | 157  | 2.168  | 99% |
| JS-2-53 | 152  | 197 | 0.77 | 0.049 | 0.002 | 0.171 | 0.007 | 0.025 | 0.0003 | 0.294 | 172  | 93.505  | 160  | 6.073  | 160  | 1.913  | 99% |
| JS-2-54 | 143  | 338 | 0.42 | 0.057 | 0.005 | 0.348 | 0.031 | 0.044 | 0.0004 | 0.094 | 509  | 199.820 | 303  | 23.376 | 278  | 2.295  | 91% |
| JS-2-55 | 272  | 236 | 1.15 | 0.052 | 0.002 | 0.183 | 0.008 | 0.025 | 0.0003 | 0.304 | 283  | 94.430  | 170  | 6.553  | 162  | 2.034  | 95% |
| JS-2-56 | 182  | 179 | 1.02 | 0.055 | 0.003 | 0.209 | 0.010 | 0.028 | 0.0004 | 0.339 | 413  | 109.250 | 193  | 8.103  | 177  | 2.726  | 91% |
| JS-2-57 | 107  | 103 | 1.04 | 0.055 | 0.004 | 0.140 | 0.008 | 0.019 | 0.0004 | 0.341 | 398  | 149.985 | 133  | 7.391  | 122  | 2.441  | 91% |
| JS-2-58 | 208  | 199 | 1.04 | 0.051 | 0.002 | 0.172 | 0.007 | 0.025 | 0.0004 | 0.343 | 233  | 103.688 | 161  | 6.180  | 160  | 2.244  | 99% |
| JS-2-59 | 60.7 | 119 | 0.51 | 0.050 | 0.003 | 0.183 | 0.009 | 0.027 | 0.0005 | 0.349 | 211  | 133.315 | 170  | 7.529  | 173  | 2.859  | 98% |
| JS-2-60 | 486  | 864 | 0.56 | 0.054 | 0.001 | 0.437 | 0.009 | 0.058 | 0.0006 | 0.502 | 383  | 45.365  | 368  | 6.178  | 364  | 3.552  | 98% |
| JS-2-61 | 167  | 159 | 1.05 | 0.052 | 0.003 | 0.173 | 0.009 | 0.025 | 0.0003 | 0.281 | 265  | 123.130 | 162  | 7.464  | 156  | 2.161  | 96% |
| JS-2-62 | 187  | 215 | 0.87 | 0.050 | 0.002 | 0.175 | 0.008 | 0.026 | 0.0003 | 0.292 | 187  | 112.020 | 164  | 6.650  | 164  | 2.079  | 99% |

|         |     |     |      |       |       |       |       |       |        |       |      |         |      |        |      |        |     |
|---------|-----|-----|------|-------|-------|-------|-------|-------|--------|-------|------|---------|------|--------|------|--------|-----|
| JS-2-63 | 128 | 180 | 0.71 | 0.050 | 0.002 | 0.177 | 0.007 | 0.026 | 0.0003 | 0.319 | 206  | 99.985  | 166  | 6.313  | 164  | 2.136  | 98% |
| JS-2-64 | 102 | 177 | 0.58 | 0.155 | 0.002 | 9.803 | 0.140 | 0.455 | 0.0038 | 0.585 | 2407 | 22.838  | 2416 | 13.222 | 2417 | 16.854 | 99% |
| JS-2-65 | 132 | 165 | 0.80 | 0.049 | 0.002 | 0.221 | 0.009 | 0.033 | 0.0006 | 0.467 | 139  | 99.985  | 202  | 7.181  | 212  | 3.818  | 95% |
| JS-2-66 | 203 | 259 | 0.79 | 0.049 | 0.002 | 0.175 | 0.007 | 0.026 | 0.0004 | 0.336 | 154  | 92.580  | 163  | 6.263  | 163  | 2.247  | 99% |
| JS-2-67 | 387 | 429 | 0.90 | 0.050 | 0.002 | 0.160 | 0.005 | 0.023 | 0.0003 | 0.429 | 183  | 72.210  | 151  | 4.581  | 148  | 2.056  | 98% |
| JS-2-68 | 271 | 287 | 0.94 | 0.049 | 0.002 | 0.159 | 0.006 | 0.024 | 0.0003 | 0.348 | 139  | 91.653  | 150  | 5.185  | 150  | 1.919  | 99% |
| JS-2-69 | 317 | 250 | 1.27 | 0.049 | 0.002 | 0.166 | 0.006 | 0.025 | 0.0003 | 0.347 | 200  | 88.875  | 156  | 5.518  | 156  | 2.048  | 99% |
| JS-2-70 | 205 | 207 | 0.99 | 0.050 | 0.002 | 0.185 | 0.009 | 0.027 | 0.0004 | 0.331 | 191  | 111.095 | 173  | 7.360  | 172  | 2.608  | 99% |
| JS-2-71 | 573 | 730 | 0.79 | 0.052 | 0.001 | 0.219 | 0.005 | 0.031 | 0.0003 | 0.454 | 272  | 53.695  | 201  | 4.161  | 194  | 1.975  | 96% |
| JS-2-72 | 122 | 190 | 0.64 | 0.048 | 0.002 | 0.164 | 0.008 | 0.024 | 0.0004 | 0.318 | 124  | 84.250  | 154  | 6.970  | 154  | 2.362  | 99% |
| JS-2-73 | 207 | 354 | 0.58 | 0.049 | 0.002 | 0.180 | 0.006 | 0.026 | 0.0004 | 0.404 | 167  | 81.468  | 168  | 5.444  | 168  | 2.357  | 99% |
| JS-2-74 | 308 | 242 | 1.27 | 0.051 | 0.002 | 0.153 | 0.006 | 0.022 | 0.0003 | 0.390 | 254  | 98.133  | 144  | 5.474  | 137  | 2.151  | 94% |
| JS-2-75 | 283 | 254 | 1.12 | 0.049 | 0.002 | 0.173 | 0.007 | 0.025 | 0.0003 | 0.331 | 165  | 89.800  | 162  | 5.916  | 162  | 2.095  | 99% |
| JS-2-76 | 194 | 363 | 0.53 | 0.053 | 0.001 | 0.346 | 0.009 | 0.047 | 0.0005 | 0.403 | 339  | 61.105  | 302  | 6.832  | 296  | 3.052  | 98% |
| JS-2-77 | 165 | 227 | 0.73 | 0.049 | 0.002 | 0.172 | 0.007 | 0.025 | 0.0004 | 0.338 | 169  | 99.985  | 161  | 6.256  | 161  | 2.260  | 99% |
| JS-2-78 | 331 | 455 | 0.73 | 0.054 | 0.002 | 0.181 | 0.006 | 0.024 | 0.0003 | 0.366 | 367  | 73.140  | 169  | 4.869  | 155  | 1.755  | 91% |
| JS-2-79 | 199 | 196 | 1.01 | 0.050 | 0.002 | 0.176 | 0.008 | 0.026 | 0.0004 | 0.336 | 189  | 101.835 | 165  | 6.789  | 165  | 2.440  | 99% |
| JS-2-80 | 321 | 425 | 0.76 | 0.051 | 0.002 | 0.160 | 0.006 | 0.023 | 0.0003 | 0.369 | 235  | 77.765  | 151  | 5.176  | 145  | 1.948  | 95% |
| JS-2-81 | 196 | 211 | 0.93 | 0.049 | 0.002 | 0.170 | 0.008 | 0.025 | 0.0003 | 0.302 | 169  | 107.393 | 159  | 6.588  | 159  | 2.121  | 99% |
| JS-2-82 | 210 | 279 | 0.75 | 0.050 | 0.002 | 0.168 | 0.006 | 0.025 | 0.0003 | 0.331 | 172  | 90.728  | 157  | 5.298  | 158  | 1.873  | 99% |
| JS-2-83 | 343 | 374 | 0.92 | 0.052 | 0.002 | 0.178 | 0.005 | 0.025 | 0.0003 | 0.373 | 287  | 76.843  | 166  | 4.518  | 159  | 1.722  | 95% |
| JS-2-85 | 276 | 599 | 0.46 | 0.051 | 0.001 | 0.292 | 0.007 | 0.041 | 0.0005 | 0.516 | 257  | 49.993  | 260  | 5.181  | 260  | 2.971  | 99% |
| JS-2-86 | 252 | 367 | 0.69 | 0.049 | 0.002 | 0.158 | 0.006 | 0.023 | 0.0003 | 0.353 | 146  | 87.025  | 149  | 5.071  | 150  | 1.907  | 99% |
| JS-2-88 | 216 | 217 | 1.00 | 0.047 | 0.002 | 0.155 | 0.007 | 0.024 | 0.0003 | 0.316 | 35.3 | 164.795 | 146  | 5.957  | 154  | 2.112  | 94% |
| JS-2-89 | 184 | 239 | 0.77 | 0.053 | 0.002 | 0.191 | 0.008 | 0.026 | 0.0004 | 0.391 | 345  | 88.880  | 178  | 6.591  | 167  | 2.603  | 93% |
| JS-2-90 | 126 | 143 | 0.88 | 0.055 | 0.003 | 0.195 | 0.009 | 0.026 | 0.0004 | 0.344 | 417  | 112.950 | 181  | 7.895  | 167  | 2.702  | 91% |

|         |     |     |      |       |       |       |       |       |        |       |     |         |     |       |     |       |     |
|---------|-----|-----|------|-------|-------|-------|-------|-------|--------|-------|-----|---------|-----|-------|-----|-------|-----|
| JS-2-91 | 403 | 452 | 0.89 | 0.051 | 0.002 | 0.157 | 0.005 | 0.022 | 0.0002 | 0.312 | 257 | 71.285  | 148 | 4.603 | 140 | 1.451 | 94% |
| JS-2-92 | 162 | 185 | 0.87 | 0.050 | 0.002 | 0.175 | 0.008 | 0.026 | 0.0004 | 0.340 | 209 | 112.020 | 164 | 6.773 | 164 | 2.464 | 99% |
| JS-2-93 | 164 | 159 | 1.03 | 0.053 | 0.004 | 0.159 | 0.009 | 0.023 | 0.0004 | 0.336 | 339 | 147.203 | 150 | 7.805 | 145 | 2.709 | 97% |
| JS-2-94 | 104 | 148 | 0.70 | 0.050 | 0.003 | 0.177 | 0.009 | 0.026 | 0.0004 | 0.317 | 187 | 120.353 | 165 | 7.441 | 165 | 2.522 | 99% |
| JS-2-95 | 200 | 272 | 0.74 | 0.049 | 0.002 | 0.170 | 0.006 | 0.025 | 0.0003 | 0.346 | 146 | 87.025  | 160 | 5.559 | 160 | 2.054 | 99% |

**Table S5** Element ratios of samples from Yong'an basin

| Element ratio | Granite | Andesite | Zhangping Fm. | Bantou Fm. | Shaxian Fm. | Chong'an Fm. | Felsic sources | Mafic sources |
|---------------|---------|----------|---------------|------------|-------------|--------------|----------------|---------------|
| La/Sc         | 8       | 0.9      | 4.23~4.42     | 3.58~6.35  | 1.30~9.38   | 3.56~4.92    | 2.5~16.33      | 0.43~0.86     |
| Th/Sc         | 3.57    | 0.22     | 1.55~1.64     | 1.43~2.66  | 1.21~1.79   | 1.37~1.80    | 0.84~20.5      | 0.05~0.22     |
| Cr/Th         | 0.44    | 9.77     | 2.70~2.71     | 1.45~4.59  | 2.67~5.70   | 3.50~6.78    | 4.00~15.0      | 25.0~500      |
| Co/Th         | 0.17    | 4.65     | 0.16~0.19     | 0.12~0.30  | 0.44~0.99   | 0.44~0.52    | 0.22~1.5       | 7.1~8.3       |
| Eu/Eu*        | 0.34    | 0.66     | 0.52~0.54     | 0.47~0.62  | 0.59~0.70   | 0.55~0.60    | 0.40~0.94      | 0.71~0.95     |
